# Supplementary material
Source: bioRxiv or medRxiv preprint supplement (https://www.biorxiv.org/highwire/filestream/108602/field_highwire_adjunct_files/11/178806-2.pdf)
Supplement: Supplementary file [file 178806-2.pdf]

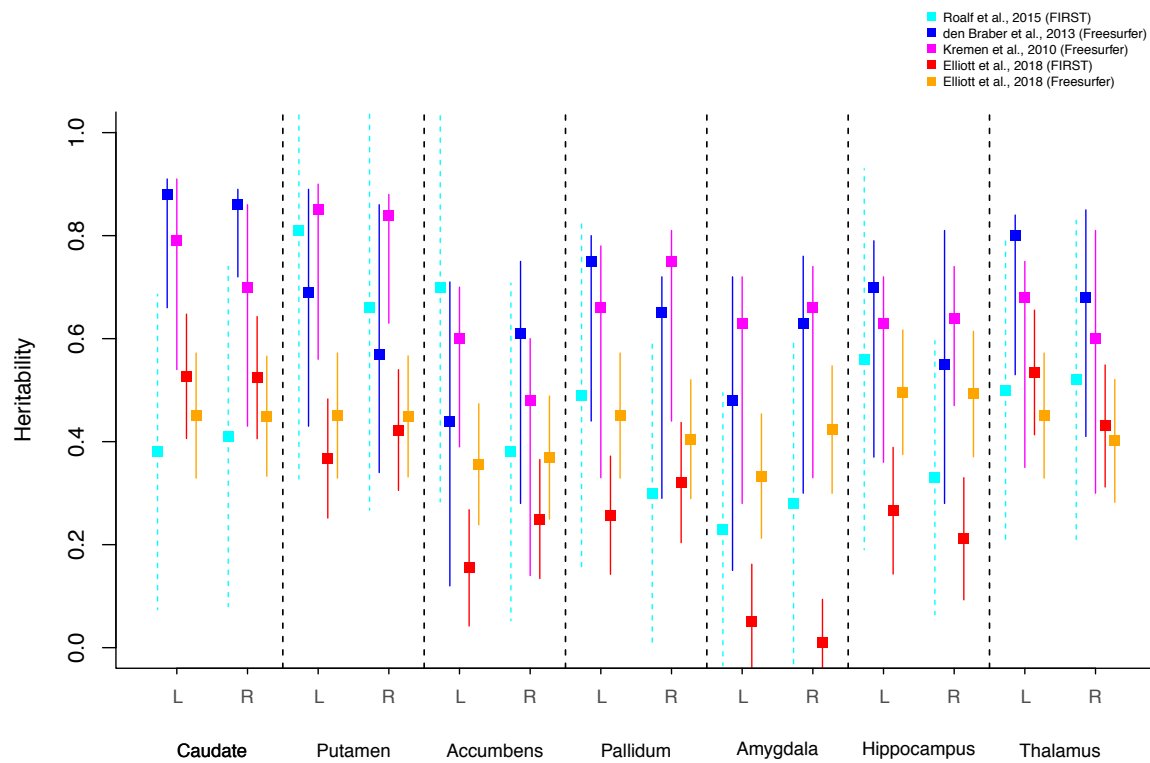

**Supplementary Figure 2 : Forest plot comparing heritability estimates for the sub-cortical volumes.** Estimates that we report using both FIRST (red) and Freesurfer (yellow) segmentations are compared to those from three previous studies: Roalf et al., 2015 (a study incorporating 190 individuals from 32 multiplex-multigenerational families with schizophrenia and 249 healthy volunteers) (cyan), den Braber et al., 2013 (a twin study incorporating 176 MZ and 88 DZ twin-pairs) (blue) and Kremen et al., 2010 (another twin study comprising 474 middle-aged male twins from the Vietnam Era Twin Study of Aging) (magenta). Coloured squares denote reported estimates and lines indicate the corresponding 95% confidence intervals. For the Roalf et al., 2015 study, only p values were reported, so the confidence intervals shown were estimated from these.
